# Supplementary material for: Inferring copy number and genotype in tumour exome data
Source: PubMed Central journal article supplement (PMC4162913; doi:10.1186/1471-2164-15-732), 2014-08-28

### OV1 - copy number profile

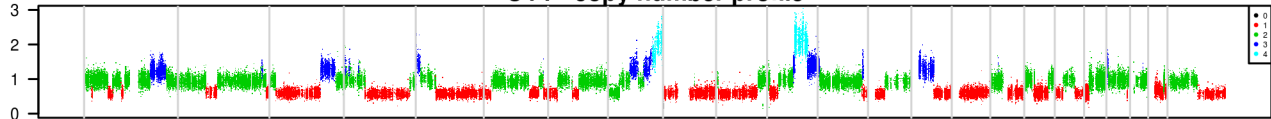

### OV1 - LOH profile

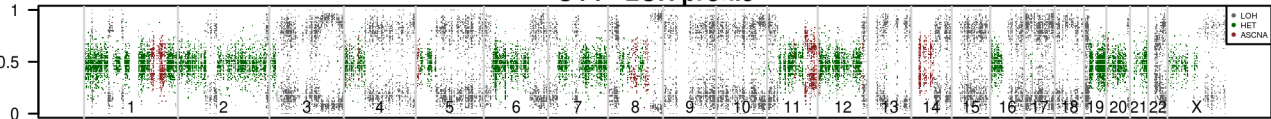

### OV2 - copy number profile

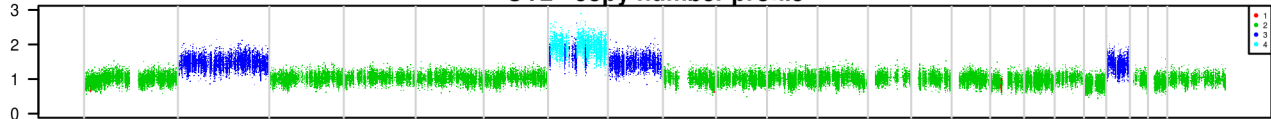

### OV2 - LOH profile

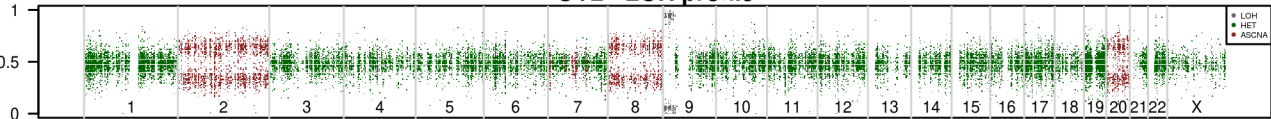

### OV3 - copy number profile

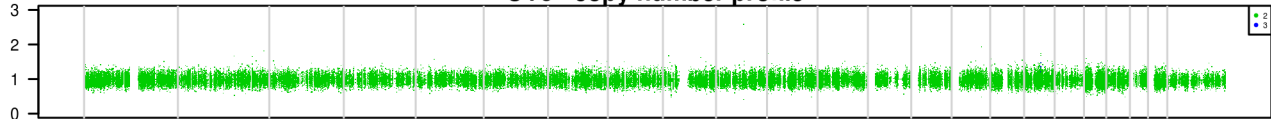

### OV3 - LOH profile

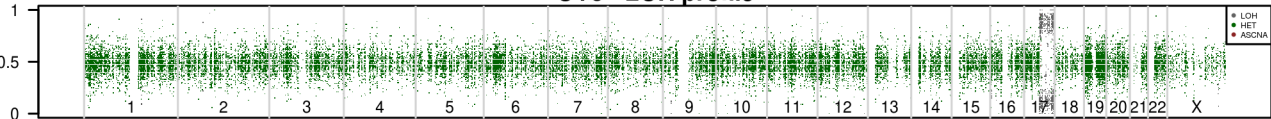

### OV4 - copy number profile

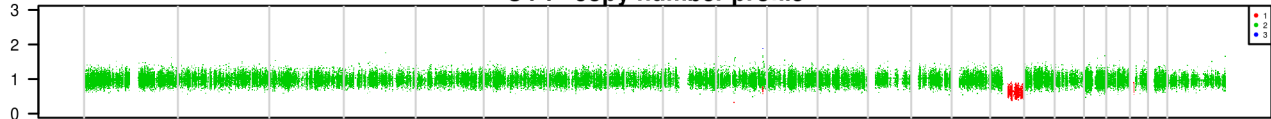

### OV4 - LOH profile

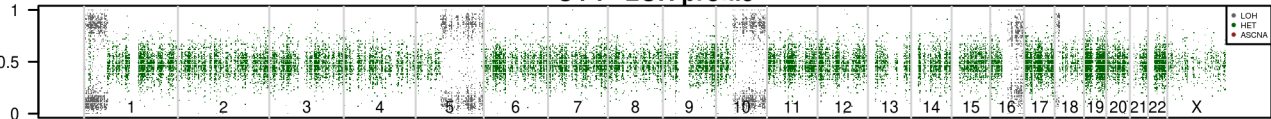

### OV5 - copy number profile

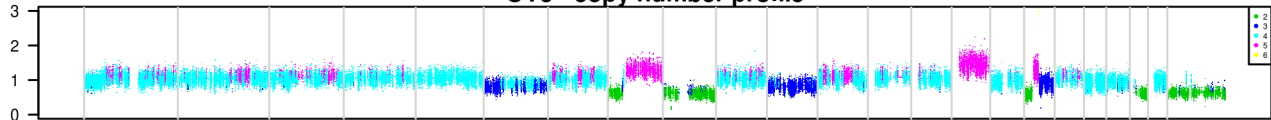

### OV5 - LOH profile

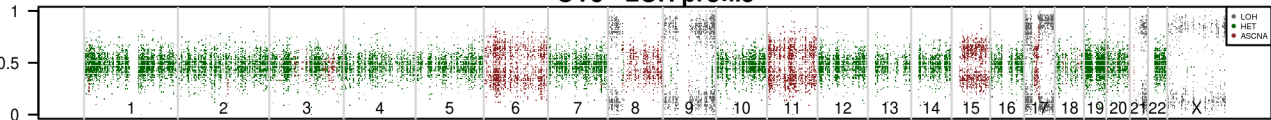

### OV6 - copy number profile

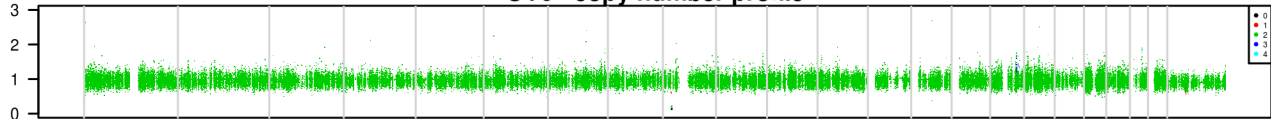

### OV6 - LOH profile

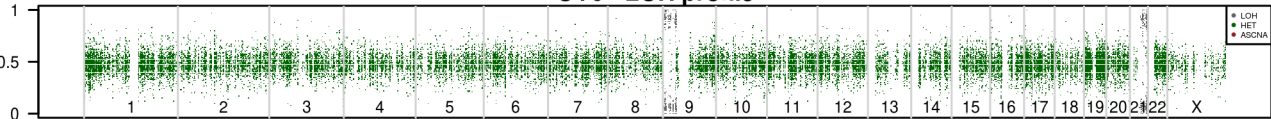

### OV7 - copy number profile

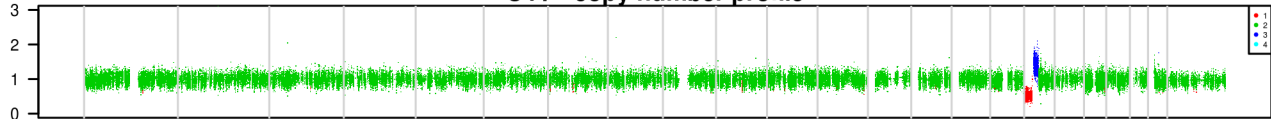

### OV7 - LOH profile

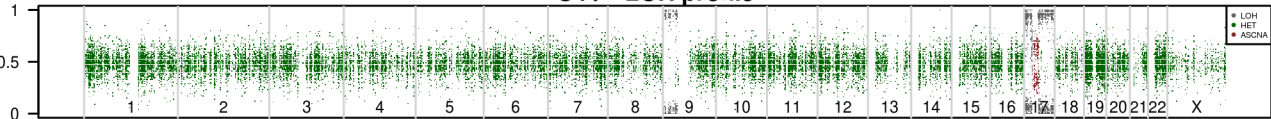





### OV9 - copy number profile

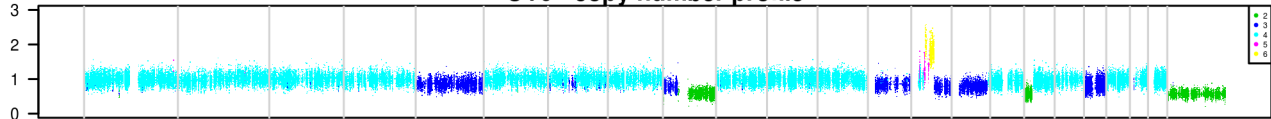

### OV9 - LOH profile

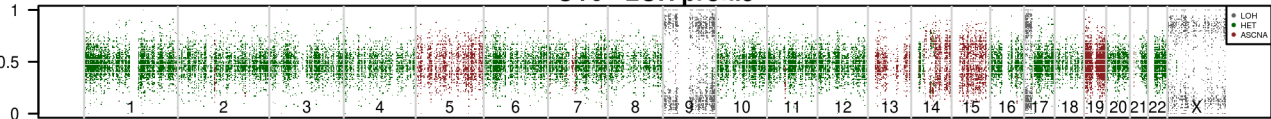

### OV10 - copy number profile

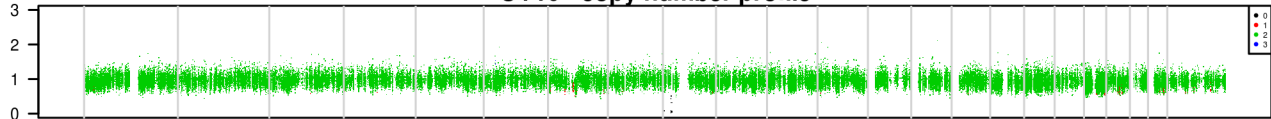

### OV10 - LOH profile

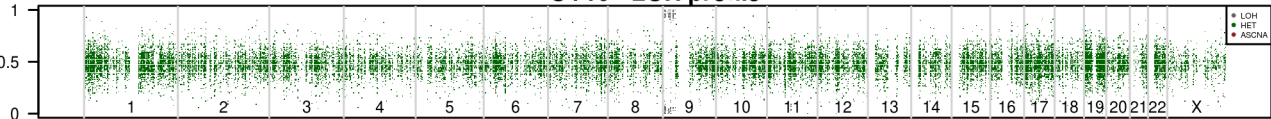

### OV11 - copy number profile

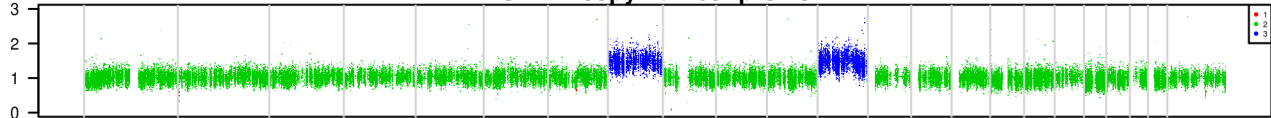

### OV11 - LOH profile

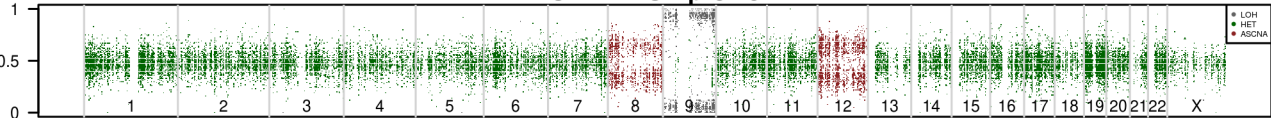

### OV12 - copy number profile

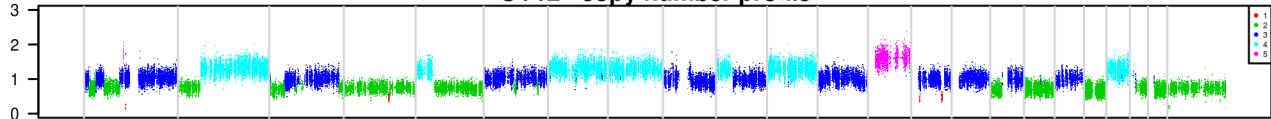

### OV12 - LOH profile

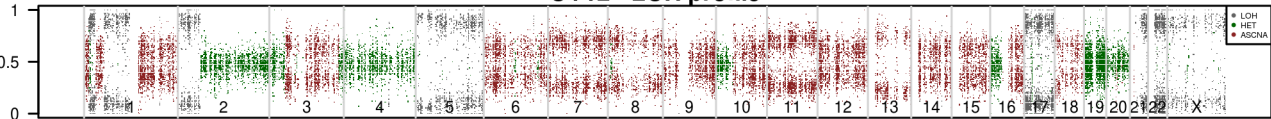

### OV13 - copy number profile

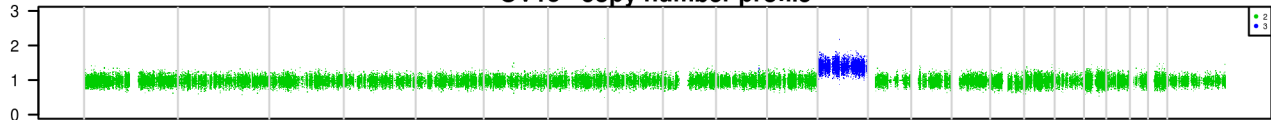

### OV13 - LOH profile

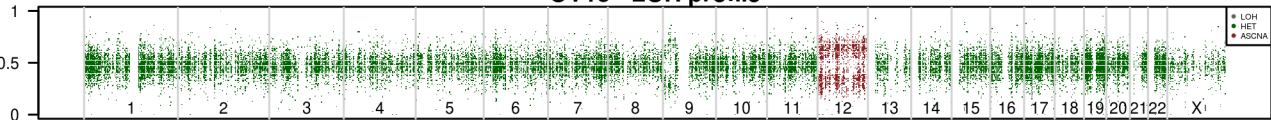

### OV14 - copy number profile

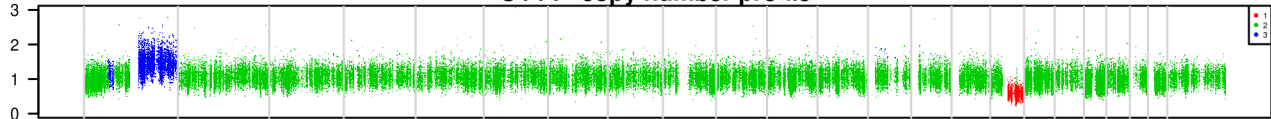

### OV14 - LOH profile

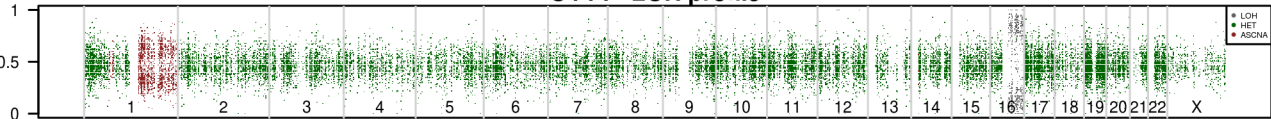



### OV16 - copy number profile

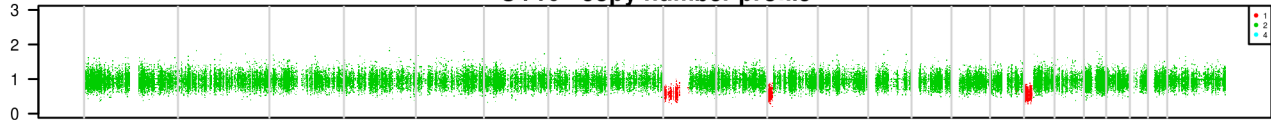

### OV16 - LOH profile

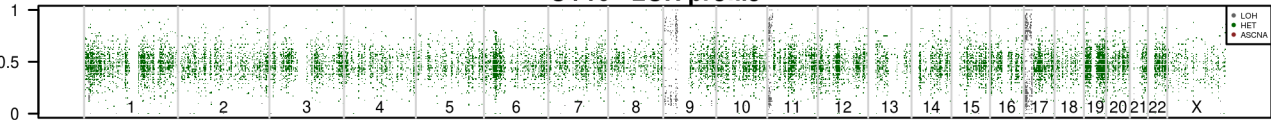

Supplement: 12864_2014_6426_MOESM2_ESM.pdf [file 12864_2014_6426_MOESM2_ESM.pdf]
