# Supplementary material for: Inferring copy number and genotype in tumour exome data
Source: PubMed Central journal article supplement (PMC4162913; doi:10.1186/1471-2164-15-732), 2014-08-28
Supplement: 12864_2014_6426_MOESM1_ESM.pdf [file 12864_2014_6426_MOESM1_ESM.pdf]

# Inferring copy number and genotype in tumour exome data

Kaushalya C Amarasinghe<sup>1</sup>, Jason Li<sup>1,2</sup>, Sally M Hunter<sup>3</sup>, Georgina L Ryland<sup>3</sup>, Prue A Cowin<sup>4</sup>, Ian G Campbell<sup>3,5,6</sup>, Saman K Halgamuge<sup>1</sup>

<sup>1</sup>Optimisation and Pattern Recognition group, Mechanical Engineering Department, Melbourne School of Engineering, The University of Melbourne, Parkville, Victoria 3010, Australia

<sup>2</sup>Bioinformatics Core Facility, Peter MacCallum Cancer Centre, East Melbourne, Victoria 3002, Australia

<sup>3</sup>Cancer Genetics Laboratory, Peter MacCallum Cancer Centre, East Melbourne, Victoria 3002, Australia

<sup>4</sup>Cancer Genomics and Genetics Laboratory, Peter MacCallum Cancer Centre, East Melbourne, Victoria 3002, Australia

<sup>5</sup>Sir Peter MacCallum Department of Oncology, The University of Melbourne, Parkville, Victoria 3010, Australia

<sup>6</sup>Department of Pathology, The University of Melbourne, Parkville, Victoria 3010, Australia

\*Corresponding author

Email addresses:

KCA: [kca@student.unimelb.edu.au](mailto:kca@student.unimelb.edu.au)

JL: [jason.li@petermac.org](mailto:jason.li@petermac.org)

SMH: [sally.hunter@petermac.org](mailto:sally.hunter@petermac.org)

GLR: [georgina.ryland@petermac.org](mailto:georgina.ryland@petermac.org)

PAC: [prue.cowin@gmail.com](mailto:prue.cowin@gmail.com)

IGC: [ian.campbell@petermac.org](mailto:ian.campbell@petermac.org)

SKH: [saman@unimelb.edu.au](mailto:saman@unimelb.edu.au)

## Contents

|       |                                                        |    |
|-------|--------------------------------------------------------|----|
| 1     | Supplementary Methods .....                            | 3  |
| 1.1   | HMM to predict copy number alterations.....            | 3  |
| 1.1.1 | Emission distribution.....                             | 3  |
| 1.2   | Parameters used in the comparison of each method ..... | 4  |
| 2     | Supplementary Figures .....                            | 5  |
|       | Figure S1.....                                         | 5  |
|       | Figure S2.....                                         | 6  |
|       | Figure S3.....                                         | 6  |
|       | Figure S4.....                                         | 7  |
|       | Figure S5.....                                         | 8  |
|       | Figure S6.....                                         | 8  |
|       | Figure S7.....                                         | 9  |
|       | Figure S8.....                                         | 9  |
|       | Figure S9.....                                         | 10 |
| 3     | Supplementary Tables .....                             | 11 |
|       | Table S1.....                                          | 11 |
|       | Table S2.....                                          | 12 |
|       | Table S3.....                                          | 12 |
|       | Table S4.....                                          | 12 |
|       | Table S5.....                                          | 13 |
|       | Table S6.....                                          | 14 |
|       | Table S7.....                                          | 15 |
|       | Table S8.....                                          | 15 |
|       | Table S9.....                                          | 15 |
|       | Table S10.....                                         | 16 |
|       | Table S11.....                                         | 19 |
|       | Table S12.....                                         | 19 |
| 4     | References .....                                       | 19 |

# 1 Supplementary Methods

## 1.1 HMM to predict copy number alterations

This step predicts the unknown copy number state sequence from the observed depth of coverage (DOC) ratios. The hidden states of the HMM represent the copy number states of each targeted region. In the default settings we have five different copy number states representing 0 to 4 copy numbers. These states are interpreted in biological context as homozygous deletion (copy 0), hemizygous deletion (copy 1), no CNV or copy neutral (copy 2), 1 copy gain (copy 3), and copy amplifications (copy 4 and above).

The observed DOC ratios ( $R_{ij}$ ) are smoothed by applying DWT denoising before feeding them to the HMM. Here,  $R_{ij}$  represents the DOC ratio of the  $i^{\text{th}}$  targeted region in  $j^{\text{th}}$  chromosome. Each chromosome  $j$  of each tumour-control samples pair is considered separately for copy number identification. The fitted discrete time HMM is given below:

1. The total number of hidden states in the model is given by  $K$  and those are denoted by  $S = S_1, S_2, \dots, S_K$ . If there are  $L$  exons in the sample of consideration, the state of  $i^{\text{th}}$  exon ( $e_i$ ) equals to  $S_k$  where  $1 \leq i \leq L$  and  $1 \leq k \leq K$ .
2. The initial state distribution  $\pi = \{\pi_k\}$  where

$$\pi_k = P(e_1 = S_k), \quad 1 \leq k \leq K$$

3. The state transition probability distribution  $A = a_{mp}$  where

$$a_{mp} = P(e_{i+1} = S_p | e_i = S_m), \quad 1 \leq m, p \leq K$$

4. The emission probability distribution is given by  $B = \{b_k(\mathbf{O})\}$  where

$$\{b_k(\mathbf{O})\} = N(\mathbf{O}_i, \mu_k, \sigma^2), \quad 1 \leq i \leq L \text{ and } 1 \leq k \leq K$$

Here,  $N$  represents the Gaussian distribution. Mean ( $\mu_k$ ) of that distribution vary with different states and the normal cell contamination percentage and ploidy. We used a common standard deviation,  $\sigma$ , for all states.

Above HMM can be represented compactly as  $\lambda = (A, B, \pi)$  where  $A$ ,  $B$  and  $\pi$  represent transition probability matrix, emission probability distribution and initial state distribution.

### 1.1.1 Emission distribution

A 100% pure diploid tumour sample would have DOC ratios (0,0.5,1,1.5) representing copy numbers (0,1,2,3) correspondingly. However, this is not essentially the case when there is normal contamination, aneuploidy and polyploidy present in the data. A polyploid sample with normal

contamination will see a deviation in the relationship between copy number and DOC ratio. This relationship is given by,

$$R_{ij} = \frac{2\alpha + (1 - \alpha)P_{Tij}}{P_T} \text{-----> (1)}$$

Where  $\alpha$ ,  $P_{Tij}$  and  $P_T$  represent normal contamination, copy number of considered tumour region and ploidy of tumour sample respectively.

Therefore, we modelled the mean of emission distribution by equation 1, where  $P_{Tij}$  depends on the copy number of each hidden state.  $P_T$  either can be given as an input or a best fit can be computed if B allele frequencies (BAF) are present. This computation is described in the main article.

## 1.2 Parameters used in the comparison of each method

ExomeCNV (Sathirapongsasuti, et al., 2011): We observed that this method performs better with their segment merging step, which utilizes circular binary segmentation algorithm in DNACopy package (Olshen, et al., 2004). Hence, we used the CNV segments output after the merging step and converted this to exon level copy number. We then compared its performance against copy number predictions by ASCAT on SNP 6 array data. We applied ExomeCNV version 1.2 with its default parameters, except for the read length and normal cell contamination. We applied sample specific normal cell contamination values as input to ExomeCNV based on manual inspection of the data and predictions made by ASCAT.

VarScan 2 (Koboldt, et al., 2012): This method (VarScan 2 version 3.1) segments the exome based on the differences between the read depths of tumour and normal samples. We followed the recommended workflow provided in the VarScan project page in SourceForge website (<http://varscan.sourceforge.net/copy-number-calling.html>): 1) Run VarScan 'copynumber' routine on pileup files generated by SAMtools (Li, et al., 2009), 2) Run VarScan 'copyCaller' on the results from step (1), 3) Apply circular binary segmentation (CBS) from DNACopy package (Olshen, et al., 2004), 4) Visualise the results and adjust baseline if necessary. If baseline is adjusted, then apply steps (3) and (4) again and 5) Merge segments and classify events using 'mergeSegments.pl' script. The result contained segmented exome based on the predicted CNV status of each genomic locus. Since we calculated the performance based on exon level predictions, we converted the output to exon level predictions by referring to the overlap of each exon with the predicted CNV segments. If an exon has two different CNV status predicted by consequent CNV segments, then the CNV status which overlaps with the most number of bases of the exon is taken as the correct call.

Control-FREEC (Boeva, et al., 2012): All the default parameters specified by the authors of the method (version 6.2) in their example on exome sequencing data analysis were used in our comparison study. The samples were tested with the 'contaminationAdjustment = TRUE' and 'ploidy = 2' options.

## 2 Supplementary Figures

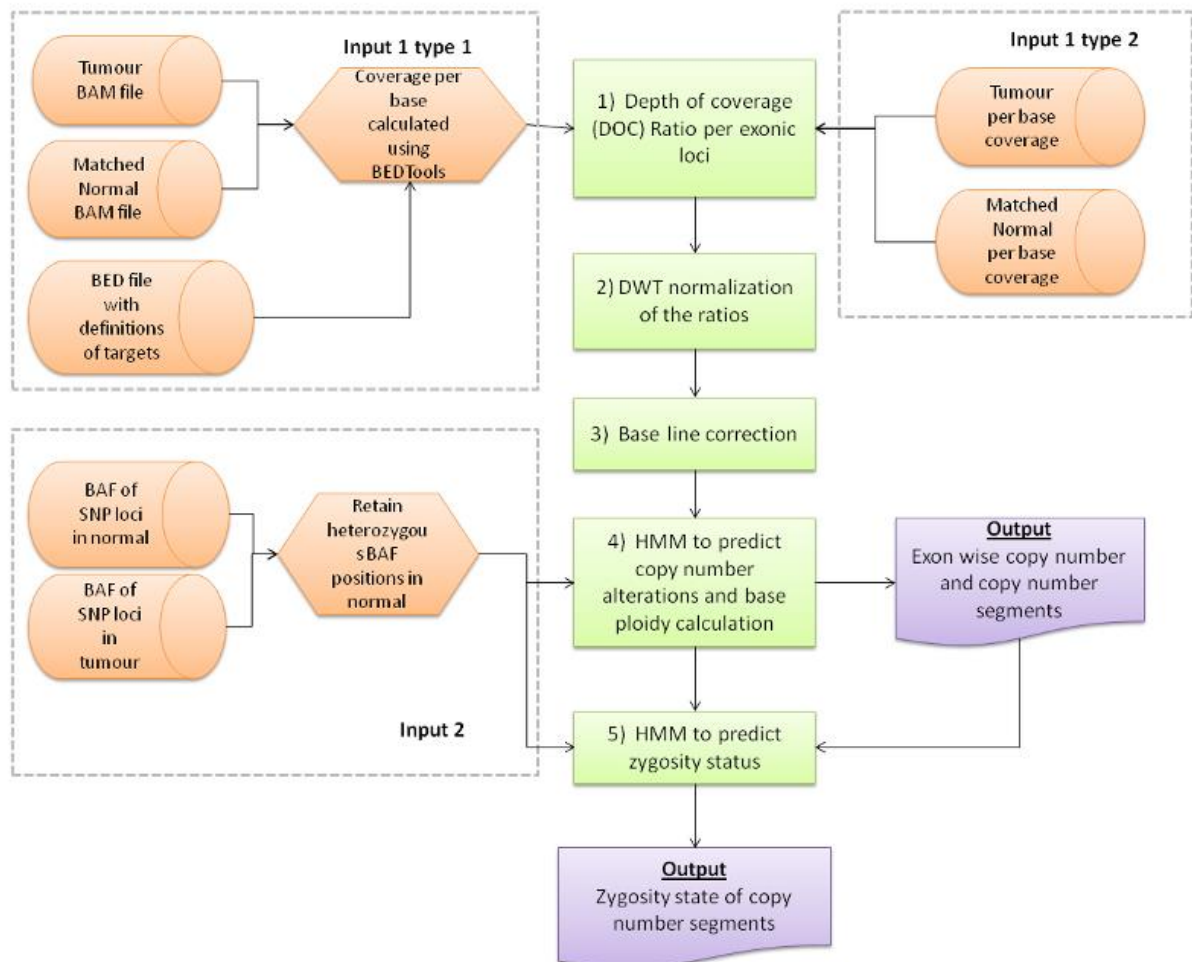

**Figure S1.** Overall workflow of the proposed algorithm ADTEEx. More details with example commands can be found in the user manual distributed with the free software package. The method accepts two inputs. 1) BAM files of tumour and matched normal samples with targeted regions definition in BED format or per base coverage files for tumour and matched normal samples generated by BED Tools. 2) B allele frequencies of tumour and normal samples at tumour SNP loci.

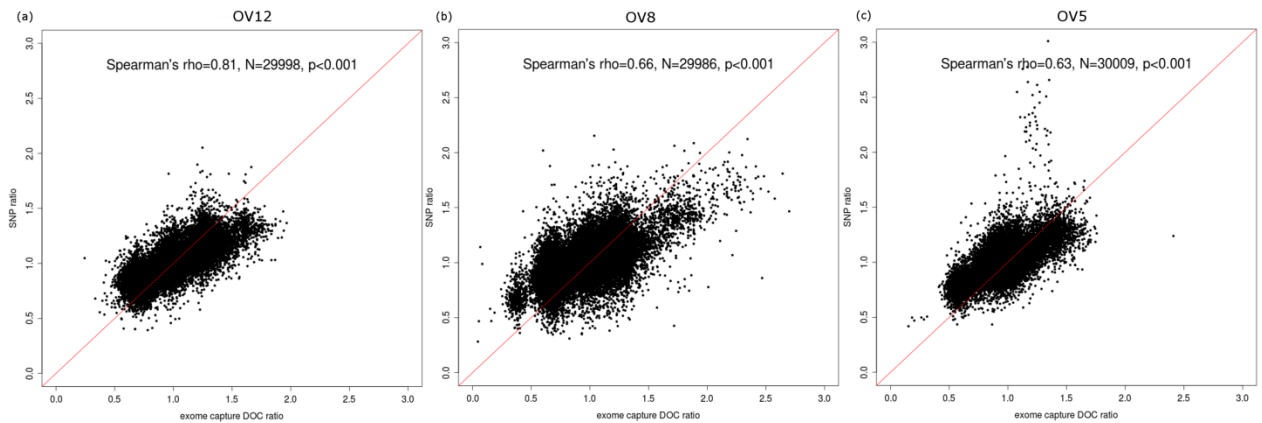

**Figure S2.** Concordance of ratio data between SNP6 ratios (vertical axis) and WES ratios (horizontal axis) in (a) OV12, (b) OV8 and (c) OV5 tumour samples. For each sample we observed statistically significant positive correlation. (OV12: 0.81, OV8: 0.66 and OV5: 0.63 with P value < 0.001).

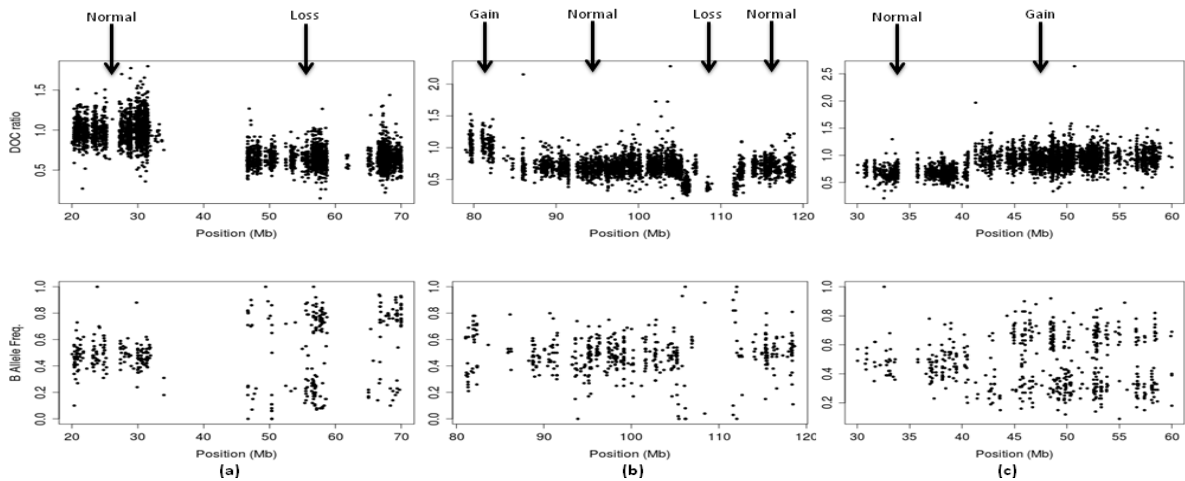

**Figure S3.** Estimating copy status of the ratios around 1. (a) OV4 (chr16) (b) OV8 (chr10) and (c) OV12 (chr3). OV4, OV8 and OV12 have copy 2, copy 3 and copy 4 states around ratio 1. These can be identified using the variation in BAFs as shown in the bottom panel.

(a)

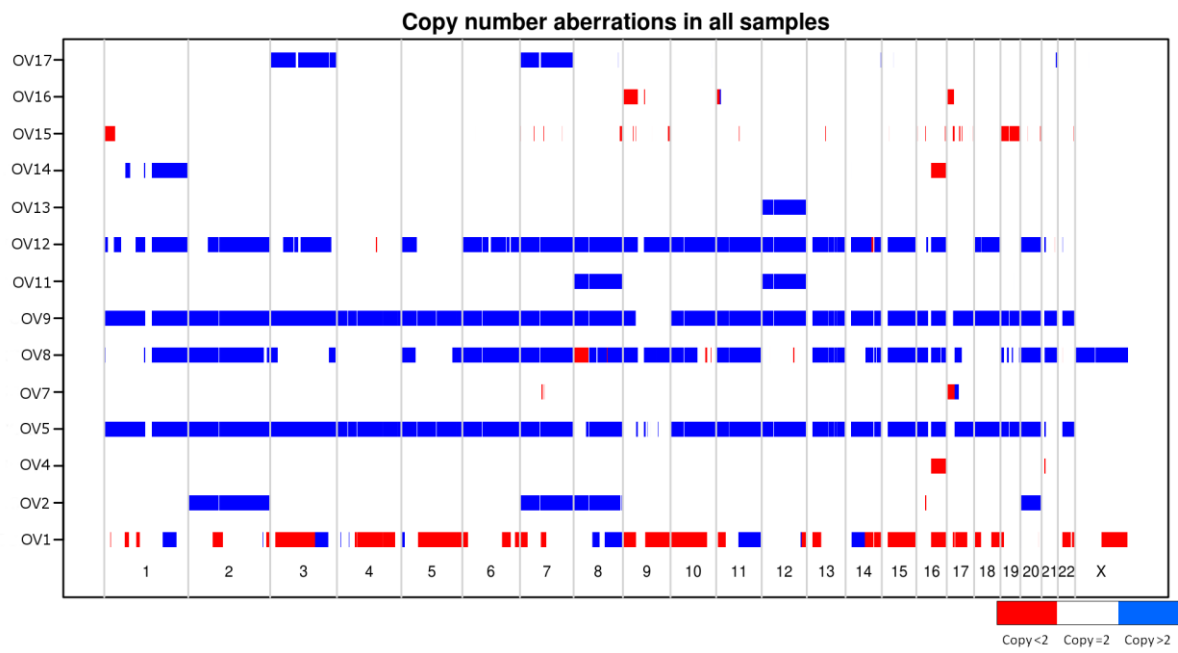

(b)

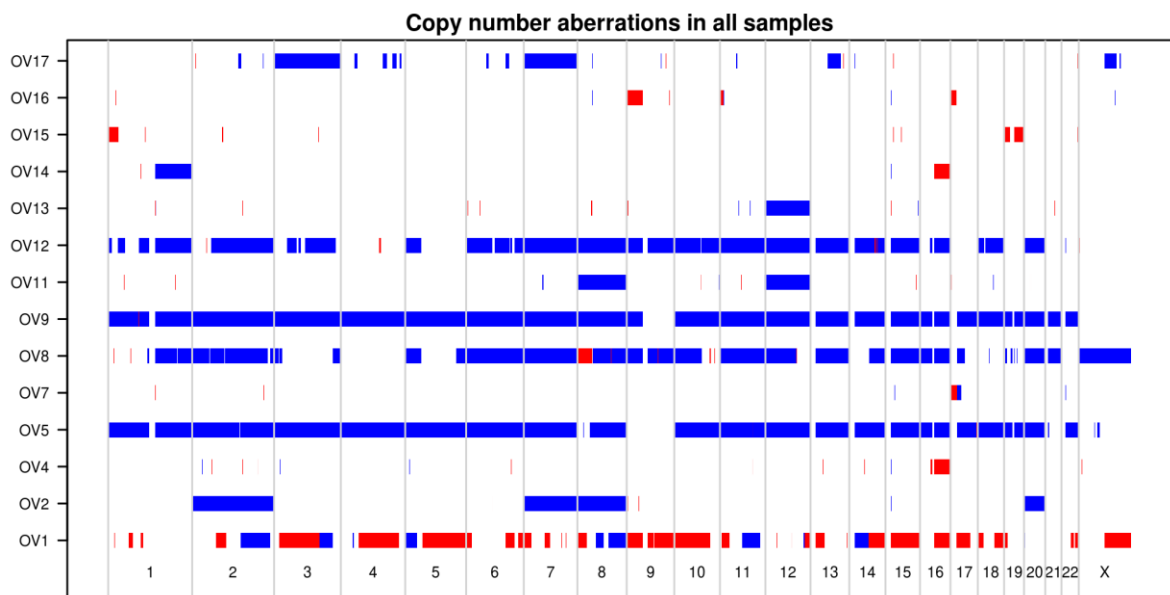

**Figure S4.** Copy number alterations predicted by (a) ADTEX and (b) ASCAT for all tumour samples with copy number alterations.

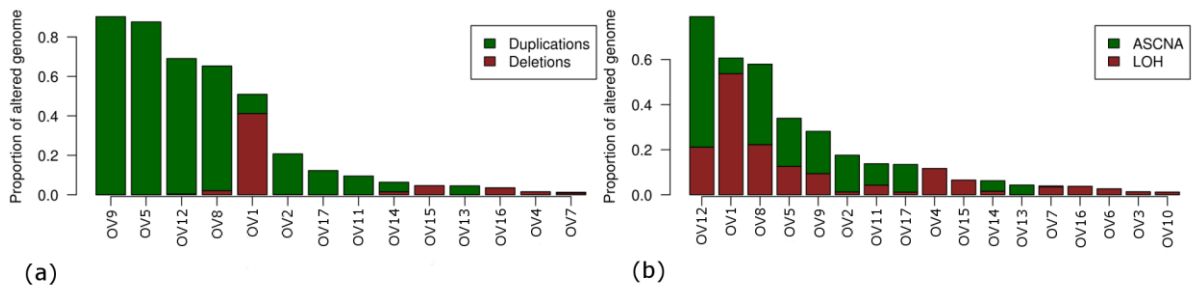

**Figure S5.** Distribution of the proportion of genome altered. Proportion of the genome altered by (a) copy number aberrations and (b) LOH as per the predictions made by ADTE<sub>x</sub> for each tumour sample.

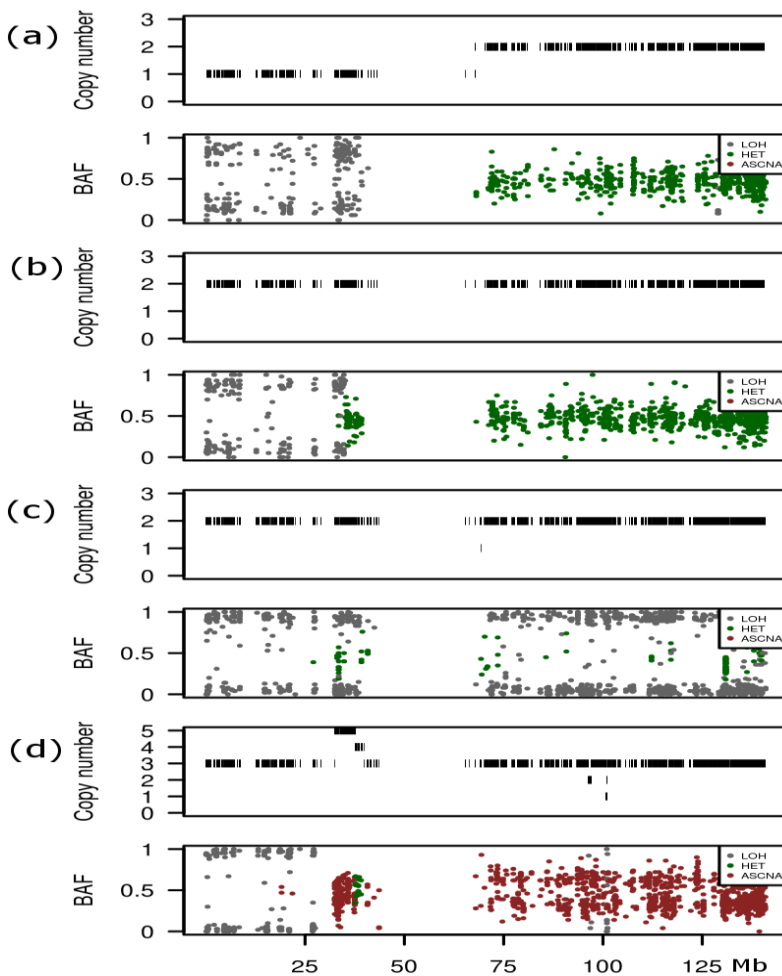

**Figure S6.** Examples of LOH event detections in the ovarian cancer samples by ADTE<sub>x</sub>. (a) Copy deletion LOH in OV16, (b) copy neutral LOH in OV17, (c) full chromosomal copy neutral LOH in OV11 and (d) copy amplified LOH in OV8.



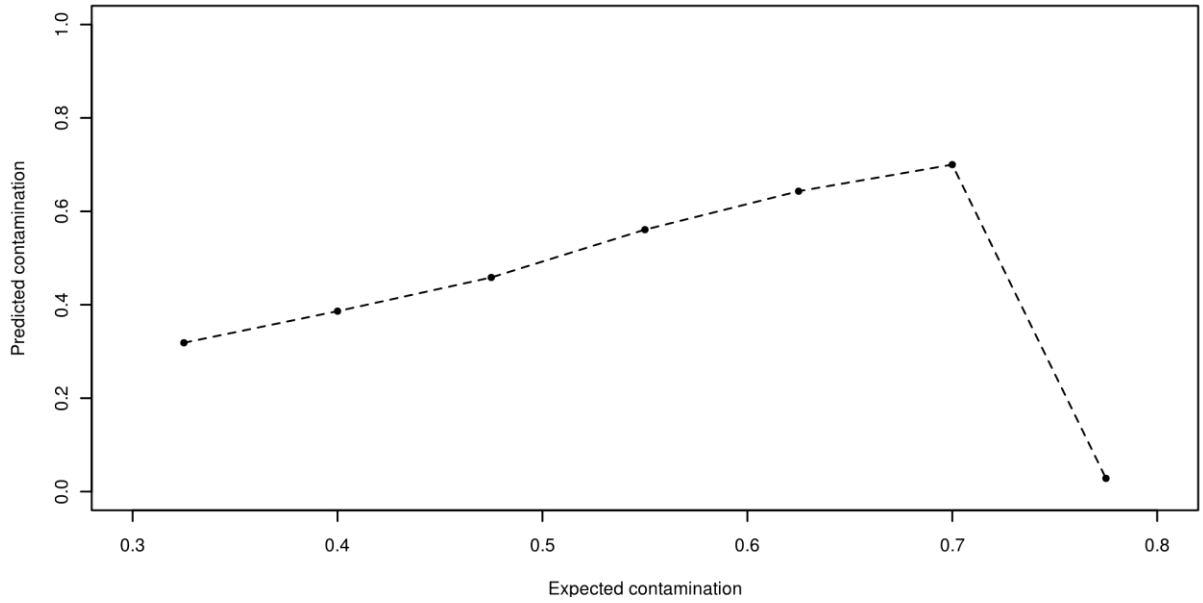

**Figure S7.** Estimated vs actual contamination levels of the simulation study at original coverage (150X).

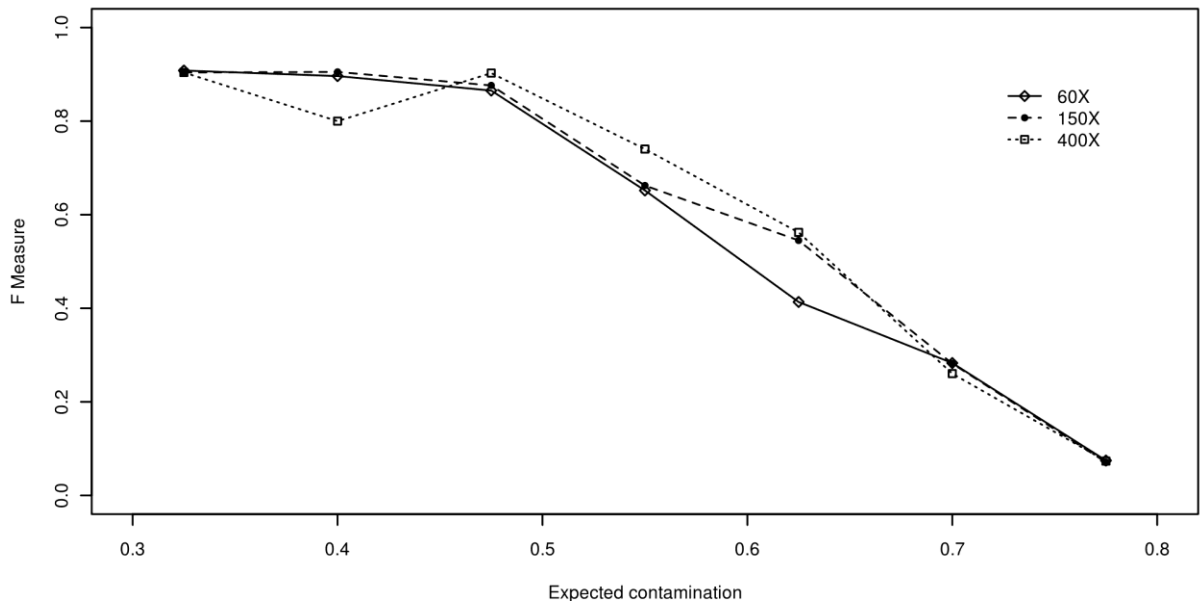

**Figure S8.** Performance of ADTEx of detecting copy number alterations in terms of F measure at each contamination level.

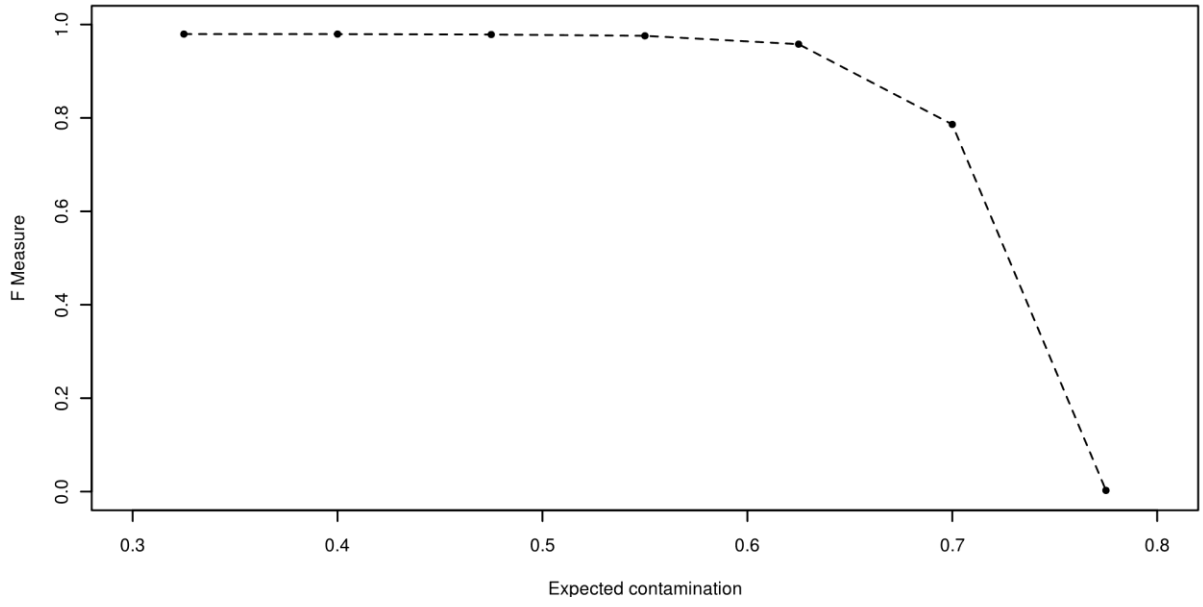

**Figure S9.** Performance of ADTEx of detecting LOH at 150X coverage.

### 3 Supplementary Tables

**Table S1.** Sample wise coverage statistics for the 17 ovarian tumours

| Sample Name | Tumour / Normal | Exome Platform                              | On target reads | Read length(bp) | Total on-target Sequenced length (Mb) | Avg. coverage per targeted base |
|-------------|-----------------|---------------------------------------------|-----------------|-----------------|---------------------------------------|---------------------------------|
| OV1         | Tumour          | Agilent SureSelect Human All Exon Version 4 | 95,108,011      | 101             | 9,606                                 | 188                             |
|             | Normal          |                                             | 96,752,923      | 101             | 9,772                                 | 191                             |
| OV2         | Tumour          | Roche NimbleGen EZ Exome SeqCap Version 2   | 130,959,793     | 100             | 13,096                                | 364                             |
|             | Normal          |                                             | 81,102,091      | 100             | 8,110                                 | 225                             |
| OV3         | Tumour          | Roche NimbleGen EZ Exome SeqCap Version 2   | 63,118,103      | 100             | 6,312                                 | 175                             |
|             | Normal          |                                             | 71,684,515      | 100             | 7,168                                 | 199                             |
| OV4         | Tumour          | Roche NimbleGen EZ Exome SeqCap Version 2   | 61,769,014      | 100             | 6,177                                 | 172                             |
|             | Normal          |                                             | 89,363,191      | 100             | 8,936                                 | 248                             |
| OV5         | Tumour          | Roche NimbleGen EZ Exome SeqCap Version 2   | 87,472,518      | 100             | 8,747                                 | 243                             |
|             | Normal          |                                             | 83,619,445      | 100             | 8,362                                 | 232                             |
| OV6         | Tumour          | Roche NimbleGen EZ Exome SeqCap Version 2   | 83,945,445      | 100             | 8,395                                 | 233                             |
|             | Normal          |                                             | 83,177,569      | 100             | 8,318                                 | 231                             |
| OV7         | Tumour          | Roche NimbleGen EZ Exome SeqCap Version 2   | 73,602,087      | 100             | 7,360                                 | 205                             |
|             | Normal          |                                             | 103,046,749     | 100             | 10,305                                | 286                             |
| OV8         | Tumour          | Roche NimbleGen EZ Exome SeqCap Version 2   | 76,919,416      | 100             | 7,692                                 | 214                             |
|             | Normal          |                                             | 73,266,587      | 100             | 7,327                                 | 204                             |
| OV9         | Tumour          | Roche NimbleGen EZ Exome SeqCap Version 2   | 54,170,665      | 100             | 5,417                                 | 151                             |
|             | Normal          |                                             | 75,610,361      | 100             | 7,561                                 | 210                             |
| OV10        | Tumour          | Roche NimbleGen EZ Exome SeqCap Version 2   | 66,934,752      | 100             | 6,693                                 | 186                             |
|             | Normal          |                                             | 81,516,449      | 100             | 8,152                                 | 227                             |
| OV11        | Tumour          | Roche NimbleGen EZ Exome SeqCap Version 2   | 65,833,549      | 100             | 6,583                                 | 183                             |
|             | Normal          |                                             | 63,483,035      | 100             | 6,348                                 | 176                             |
| OV12        | Tumour          | Roche NimbleGen EZ Exome SeqCap Version 2   | 68,826,106      | 100             | 6,883                                 | 191                             |
|             | Normal          |                                             | 77,436,221      | 100             | 7,744                                 | 215                             |
| OV13        | Tumour          | Roche NimbleGen EZ Exome SeqCap Version 2   | 97,608,354      | 100             | 9,761                                 | 271                             |
|             | Normal          |                                             | 104,017,548     | 100             | 10,402                                | 289                             |
| OV14        | Tumour          | Roche NimbleGen EZ Exome SeqCap Version 2   | 70,466,147      | 101             | 7,117                                 | 198                             |
|             | Normal          |                                             | 85,090,300      | 101             | 8,594                                 | 239                             |
| OV15        | Tumour          | Roche NimbleGen EZ Exome SeqCap Version 2   | 78,912,754      | 101             | 7,970                                 | 222                             |
|             | Normal          |                                             | 92,089,982      | 101             | 9,301                                 | 259                             |
| OV16        | Tumour          | Roche NimbleGen EZ Exome SeqCap Version 1   | 37,876,598      | 79              | 2,992                                 | 114                             |
|             | Normal          |                                             | 36,527,280      | 100             | 3,653                                 | 139                             |
| OV17        | Tumour          | Roche NimbleGen EZ Exome SeqCap Version 1   | 52,558,469      | 79              | 4,152                                 | 158                             |
|             | Normal          |                                             | 52,433,723      | 79              | 4,142                                 | 158                             |

**Table S2.** Performance summary for each sample compared with ASCAT (Van Loo, et al., 2010) copy number alteration results on SNP 6.0 data

| Sample Name | Sensitivity | Specificity | Precision | Accuracy |
|-------------|-------------|-------------|-----------|----------|
| OV1         | 89.1%       | 92.1%       | 91.9%     | 90.6%    |
| OV2         | 97.3%       | 99.5%       | 97.7%     | 99.1%    |
| OV4         | 82.4%       | 99.98%      | 98.96%    | 99.6%    |
| OV5         | 99.8%       | 98.3%       | 99.8%     | 99.6%    |
| OV7         | 98.8%       | 99.4%       | 82.6%     | 99.4%    |
| OV8         | 92.4%       | 94.2%       | 96.9%     | 93.0%    |
| OV9         | 99.9%       | 99.8%       | 99.99%    | 99.9%    |
| OV11        | 97.5%       | 99.99%      | 99.7%     | 99.7%    |
| OV12        | 99.6%       | 99.4%       | 99.7%     | 99.5%    |
| OV16        | 90.8%       | 99.98%      | 99.5%     | 99.6%    |
| OV13        | 89.1%       | 99.99%      | 99.92%    | 99.3%    |
| OV17        | 84.1%       | 99.5%       | 96.0%     | 97.6%    |
| OV14        | 98.6%       | 99.4%       | 91.6%     | 99.3%    |
| OV15        | 97.7%       | 94.7%       | 60.9%     | 94.9%    |

**Table S3.** Performance summary for each sample compared with ASCAT (Van Loo, et al., 2010) LOH prediction results on SNP 6.0 data

| Sample Name | Sensitivity | Specificity | Precision | Accuracy |
|-------------|-------------|-------------|-----------|----------|
| OV1         | 97.8%       | 98.0%       | 98.0%     | 97.9%    |
| OV2         | 79.1%       | 99.5%       | 59.6%     | 99.3%    |
| OV3         | 68.7%       | 99.9%       | 94.8%     | 98.9%    |
| OV4         | 93.7%       | 99.8%       | 98.3%     | 99.0%    |
| OV5         | 93.5%       | 99.96%      | 99.7%     | 99.1%    |
| OV6         | 89.8%       | 99.97%      | 98.4%     | 99.7%    |
| OV7         | 92.7%       | 99.6%       | 93.8%     | 99.2%    |
| OV8         | 91.4%       | 98.7%       | 95.5%     | 96.9%    |
| OV9         | 91.7%       | 99.9%       | 99.4%     | 99.2%    |
| OV10        | 22.7%       | 99.7%       | 68.9%     | 97.2%    |
| OV11        | 89.5%       | 99.8%       | 96.0%     | 99.4%    |
| OV12        | 96.2%       | 99.8%       | 99.0%     | 99.0%    |
| OV16        | 90.1%       | 99.6%       | 92.5%     | 99.0%    |
| OV13        | 1.5%        | 99.7%       | 6.1%      | 98.5%    |
| OV17        | 82.6%       | 99.7%       | 74.0%     | 99.5%    |
| OV14        | 79.6%       | 99.9%       | 92.2%     | 99.4%    |
| OV15        | 95.99%      | 91.3%       | 52.4%     | 91.7%    |

**Table S4.** Performance summary for each sample compared with ASCAT (Van Loo, et al., 2010) ASCNA prediction results on SNP 6.0 data

| Sample Name | Sensitivity | Specificity | Precision | Accuracy |
|-------------|-------------|-------------|-----------|----------|
| OV1         | 51.4%       | 97.0%       | 58.5%     | 93.5%    |
| OV2         | 96.0%       | 98.2%       | 89.5%     | 97.9%    |
| OV3         | NA          |             |           |          |

|      |        |        |        |        |
|------|--------|--------|--------|--------|
| OV4  | NA     |        |        |        |
| OV5  | 96.8%  | 97.5%  | 89.4%  | 97.3%  |
| OV6  | NA     |        |        |        |
| OV7  | 97.0%  | 99.9%  | 79.9%  | 99.9%  |
| OV8  | 70.0%  | 94.2%  | 91.0%  | 83.2%  |
| OV9  | 85.1%  | 98.1%  | 92.8%  | 95.2%  |
| OV10 | NA     |        |        |        |
| OV11 | 99.5%  | 99.99% | 99.96% | 99.95% |
| OV12 | 98.6%  | 99.0%  | 99.2%  | 98.8%  |
| OV16 | NA     |        |        |        |
| OV13 | 97.7%  | 99.99% | 99.95% | 99.9%  |
| OV17 | 89.2%  | 98.2%  | 84.9%  | 97.3%  |
| OV14 | 100.0% | 99.7%  | 95.1%  | 99.7%  |
| OV15 | NA     |        |        |        |

**Table S5.** Summary of TCGA samples included in this study (2011)

| <b>Tumor Sample</b>          | <b>Total Reads on Targets</b> | <b>Total Gb</b> | <b>Normal Sample</b>         | <b>Total Reads on Targets</b> | <b>Total Gb</b> |
|------------------------------|-------------------------------|-----------------|------------------------------|-------------------------------|-----------------|
| TCGA-04-1336-01A-01W-0488-09 | 65615059                      | 6.11            | TCGA-04-1336-11A-01W-0489-09 | 67197808                      | 6.26            |
| TCGA-04-1343-01A-01W-0488-09 | 107840152                     | 10.04           | TCGA-04-1343-10A-01W-0489-09 | 98148440                      | 9.14            |
| TCGA-04-1347-01A-01W-0488-09 | 76407526                      | 7.12            | TCGA-04-1347-11A-01W-0489-09 | 58341013                      | 5.43            |
| TCGA-04-1348-01A-01W-0494-09 | 74926564                      | 6.98            | TCGA-04-1348-11A-01W-0494-09 | 72110127                      | 6.72            |
| TCGA-04-1349-01A-01W-0494-09 | 118126167                     | 11.00           | TCGA-04-1349-11A-01W-0494-09 | 107016932                     | 9.97            |
| TCGA-04-1361-01A-01W-0494-09 | 58789066                      | 5.48            | TCGA-04-1361-11A-01W-0494-09 | 58940962                      | 5.49            |
| TCGA-04-1362-01A-01W-0494-09 | 57215953                      | 5.33            | TCGA-04-1362-10A-01W-0494-09 | 62141132                      | 5.79            |
| TCGA-04-1542-01A-01W-0553-09 | 83570502                      | 7.78            | TCGA-04-1542-10A-01W-0553-09 | 60831262                      | 5.67            |
| TCGA-09-0365-01A-02W-0372-09 | 98814914                      | 9.20            | TCGA-09-0365-10A-01W-0372-09 | 92979525                      | 8.66            |
| TCGA-09-0366-01A-01W-0372-09 | 82369580                      | 7.67            | TCGA-09-0366-10B-01W-0372-09 | 91671450                      | 8.54            |
| TCGA-09-0369-01A-01W-0372-09 | 92566190                      | 8.62            | TCGA-09-0369-10C-01W-0372-09 | 90091112                      | 8.39            |
| TCGA-09-1664-01A-01W-0639-09 | 76194803                      | 7.10            | TCGA-09-1664-11A-01W-0639-09 | 102202707                     | 9.52            |
| TCGA-09-1672-01A-01W-0633-09 | 73395933                      | 6.84            | TCGA-09-1672-10A-01W-0633-09 | 65659694                      | 6.12            |
| TCGA-10-0930-01A-02W-0421-09 | 80187835                      | 7.47            | TCGA-10-0930-11A-01W-0977-09 | 88957759                      | 8.28            |
| TCGA-10-0933-01A-01W-0421-09 | 88627046                      | 8.25            | TCGA-10-0933-11A-01W-0421-09 | 88125067                      | 8.21            |
| TCGA-10-0935-01A-03W-0421-09 | 89582634                      | 8.34            | TCGA-10-0935-11A-01W-0421-09 | 92004187                      | 8.57            |
| TCGA-13-0723-01A-02W-0372-09 | 96888212                      | 9.02            | TCGA-13-0723-10B-01W-0372-09 | 88874383                      | 8.28            |
| TCGA-13-0724-01A-01W-0372-09 | 89506994                      | 8.34            | TCGA-13-0724-10B-01W-0372-09 | 85414091                      | 7.95            |

**Table S6.** Sample wise performance summary for comparison of other methods

ExomeCNV (Sathirapongsasuti, et al., 2011):

| Sample Name | Sensitivity | Specificity | Precision | Accuracy |
|-------------|-------------|-------------|-----------|----------|
| OV1         | 90.9%       | 80.4%       | 82.2%     | 85.6%    |
| OV2         | 98.99%      | 99.3%       | 96.9%     | 99.2%    |
| OV4         | 82.4%       | 93.7%       | 22.2%     | 93.5%    |
| OV7         | 98.9%       | 98.6%       | 65.3%     | 98.6%    |
| OV11        | 97.4%       | 98.6%       | 87.2%     | 98.5%    |
| OV16        | 89.1%       | 92.5%       | 34.1%     | 92.3%    |
| OV13        | 89.0%       | 93.6%       | 47.5%     | 93.3%    |
| OV17        | 79.9%       | 98.5%       | 88.2%     | 96.2%    |
| OV14        | 98.7%       | 99.2%       | 89.4%     | 99.2%    |
| OV15        | 97.7%       | 96.4%       | 69.4%     | 96.5%    |

VarScan2 (Koboldt, et al., 2012):

| Sample Name | Sensitivity | Specificity | Precision | Accuracy |
|-------------|-------------|-------------|-----------|----------|
| OV1         | 89.10%      | 90.35%      | 90.25%    | 89.72%   |
| OV2         | 97.88%      | 91.55%      | 72.81%    | 92.74%   |
| OV4         | 82.45%      | 99.38%      | 74.84%    | 99.00%   |
| OV7         | 98.34%      | 97.69%      | 53.39%    | 97.71%   |
| OV11        | 95.69%      | 98.36%      | 85.63%    | 98.11%   |
| OV16        | 90.65%      | 99.47%      | 88.59%    | 99.10%   |
| OV13        | 89.03%      | 99.87%      | 97.85%    | 99.19%   |
| OV17        | 81.04%      | 98.94%      | 91.29%    | 96.77%   |
| OV14        | 97.70%      | 93.72%      | 51.83%    | 93.98%   |
| OV15        | 96.97%      | 93.72%      | 57.04%    | 93.98%   |

Control-FREEC (Boeva, et al., 2012):

| Sample Name | Sensitivity | Specificity | Precision | Accuracy |
|-------------|-------------|-------------|-----------|----------|
| OV1         | 20.1%       | 6.1%        | 17.7%     | 13.1%    |
| OV2         | 95.6%       | 99.9%       | 99.9%     | 99.2%    |
| OV4         | 82.4%       | 99.9%       | 95.6%     | 99.5%    |
| OV7         | 98.0%       | 99.6%       | 86.1%     | 99.5%    |
| OV11        | 97.0%       | 99.9%       | 99.2%     | 99.7%    |
| OV16        | 1.0%        | 99.8%       | 11.9%     | 95.5%    |
| OV13        | 88.8%       | 99.9%       | 98.1%     | 99.2%    |
| OV17        | 82.2%       | 99.2%       | 93.5%     | 97.2%    |
| OV14        | 99.3%       | 99.8%       | 97.0%     | 99.7%    |
| OV15        | 90.8%       | 99.0%       | 88.3%     | 98.3%    |

**Table S7.** Sample wise performance summary for LOH prediction for ADTE<sub>x</sub> and Control-FREEC (Boeva, et al., 2012)

|      | Sensitivity       |               | Specificity       |               | Precision         |               | Accuracy          |               |
|------|-------------------|---------------|-------------------|---------------|-------------------|---------------|-------------------|---------------|
|      | ADTE <sub>x</sub> | Control-FREEC | ADTE <sub>x</sub> | Control-FREEC | ADTE <sub>x</sub> | Control-FREEC | ADTE <sub>x</sub> | Control-FREEC |
| OV1  | 97.8%             | 95.3%         | 98.0%             | 93.5%         | 98.0%             | 94.1%         | 97.9%             | 94.4%         |
| OV2  | 79.1%             | 93.1%         | 99.5%             | 40.8%         | 59.6%             | 2.5%          | 99.3%             | 41.6%         |
| OV4  | 93.7%             | 100%          | 99.8%             | 0.05%         | 98.3%             | 45.6%         | 99.0%             | 45.6%         |
| OV7  | 92.6%             | 94.9%         | 99.6%             | 2.1%          | 93.8%             | 26.2%         | 99.2%             | 27.0%         |
| OV11 | 89.5%             | 100%          | 99.8%             | 28.0%         | 96.0%             | 16.5%         | 99.4%             | 36.9%         |

**Table S8.** Sample wise performance summary for ASCNA prediction for ADTE<sub>x</sub> and Control-FREEC (Boeva, et al., 2012)

|      | Sensitivity       |               | Specificity       |               | Precision         |               | Accuracy          |               |
|------|-------------------|---------------|-------------------|---------------|-------------------|---------------|-------------------|---------------|
|      | ADTE <sub>x</sub> | Control-FREEC | ADTE <sub>x</sub> | Control-FREEC | ADTE <sub>x</sub> | Control-FREEC | ADTE <sub>x</sub> | Control-FREEC |
| OV1  | 51.4%             | 60.9%         | 97.0%             | 86.3%         | 58.5%             | 29.2%         | 93.5%             | 84.1%         |
| OV2  | 96.0%             | 81.8%         | 98.2%             | 98.6%         | 89.5%             | 97.1%         | 97.9%             | 92.5%         |
| OV7  | 97.0%             | 38.7%         | 99.9%             | 98.4%         | 79.9%             | 46.0%         | 99.9%             | 96.3%         |
| OV11 | 99.5%             | 88.8%         | 100%              | 100%          | 100%              | 99.9%         | 100%              | 96.9%         |

**Table S9.** Sample wise performance summary for CNV predictions made by (Amarasinghe, et al., 2013)

| Sample Name | Sensitivity | Specificity | Precision | Accuracy |
|-------------|-------------|-------------|-----------|----------|
| OV1         | 87.4%       | 61.0%       | 69.3%     | 74.2%    |
| OV2         | 74.5%       | 80.5%       | 46.9%     | 79.4%    |
| OV4         | 82.4%       | 99.8%       | 91.2%     | 99.4%    |
| OV7         | 70.2%       | 99.4%       | 76.5%     | 98.7%    |
| OV8         | 91.3%       | 77.4%       | 88.7%     | 86.6%    |
| OV11        | 97.6%       | 99.9%       | 98.7%     | 99.7%    |
| OV16        | 90.5%       | 99.9%       | 96.5%     | 99.5%    |
| OV13        | 89.1%       | 99.8%       | 97.2%     | 99.1%    |

|      |       |       |       |       |
|------|-------|-------|-------|-------|
| OV17 | 84.1% | 99.3% | 94.5% | 97.5% |
| OV14 | 97.0% | 98.1% | 78.3% | 98.1% |
| OV15 | 96.3% | 99.8% | 97.0% | 99.5% |

**Table S10.** Arm level copy number aberrations.

| Sample | Chr | Arm | CN | Status                                                               | Detected/Not Detected |
|--------|-----|-----|----|----------------------------------------------------------------------|-----------------------|
| IC050  | 2   | 2p  | 3  | Whole chromosomal amplification                                      | Detected              |
| IC050  | 2   | 2q  | 3  | Whole chromosomal amplification                                      | Detected              |
| IC050  | 7   | 7p  | 3  | Whole chromosomal amplification                                      | Detected              |
| IC050  | 7   | 7q  | 3  | Whole chromosomal amplification                                      | Detected              |
| IC050  | 8   | 8p  | 3  | Whole chromosomal amplification                                      | Detected              |
| IC050  | 8   | 8q  | 3  | Whole chromosomal amplification                                      | Detected              |
| IC050  | 20  | 20p | 3  | Whole chromosomal amplification                                      | Detected              |
| IC050  | 20  | 20q | 3  | Whole chromosomal amplification                                      | Detected              |
| IC121  | 16  | 16q | 1  | q arm deletion                                                       | Detected              |
| IC138  | 6   | 6p  | 3  | Whole chromosomal deletion                                           | Not Detected          |
| IC138  | 6   | 6q  | 3  | Whole chromosomal deletion                                           | Not Detected          |
| IC138  | 8   | 8p  | 3  | p arm deletion                                                       | Detected              |
| IC138  | 8   | 8q  | 5  | q arm amplification                                                  | Detected              |
| IC138  | 9   | 9p  | 2  | Whole chromosomal deletion                                           | Detected              |
| IC138  | 9   | 9q  | 2  | Whole chromosomal deletion                                           | Detected              |
| IC138  | 11  | 11p | 3  | Whole chromosomal deletion                                           | Detected              |
| IC138  | 11  | 11q | 3  | Whole chromosomal deletion                                           | Detected              |
| IC138  | 15  | 15q | 5  | q arm amplification                                                  | Detected              |
| IC138  | 17  | 17p | 3  | p arm deletion                                                       | Detected              |
| IC138  | 21  | 21q | 3  | q arm deletion                                                       | Detected              |
| IC138  | X   | Xp  | 3  | Whole chromosomal deletion                                           | Detected              |
| IC138  | X   | Xq  | 3  | Whole chromosomal deletion                                           | Detected              |
| IC257  | 17  | 17p | 1  | p arm deletion                                                       | Detected              |
| IC321  | 1   | 1p  | 2  | p arm deletion                                                       | Detected              |
| IC321  | 3   | 3p  | 2  | Whole chromosomal deletion                                           | Detected              |
| IC321  | 3   | 3q  | 2  | Whole chromosomal deletion                                           | Detected              |
| IC321  | 4   | 4p  | 2  | Whole chromosomal deletion                                           | Detected              |
| IC321  | 4   | 4q  | 2  | Whole chromosomal deletion                                           | Detected              |
| IC321  | 5   | 5q  | 2  | q arm deletion                                                       | Detected              |
| IC321  | 6   | 6p  | 4  | Whole chromosomal amplification with differential arm CN(not in SNP) | Detected              |
| IC321  | 6   | 6q  | 5  | Whole chromosomal amplification with differential arm CN(not in SNP) | Detected              |
| IC321  | 7   | 7p  | 4  | Whole chromosomal amplification                                      | Detected              |
| IC321  | 7   | 7q  | 4  | Whole chromosomal amplification                                      | Detected              |
| IC321  | 8   | 8p  | 1  | p arm deletion                                                       | Detected              |
| IC321  | 10  | 10p | 4  | p arm amplification                                                  | Not Detected          |



|       |    |     |   |                                                     |              |
|-------|----|-----|---|-----------------------------------------------------|--------------|
| IC321 | 12 | 12p | 2 | Whole chromosomal deletion(not in SNP)              | Detected     |
| IC321 | 12 | 12q | 2 | Whole chromosomal deletion(not in SNP)              | Detected     |
| IC321 | 13 | 13q | 5 | q arm amplification                                 | Detected     |
| IC321 | 15 | 15q | 4 | q arm amplification                                 | Detected     |
| IC321 | 17 | 17p | 2 | p arm deletion                                      | Detected     |
| IC321 | 18 | 18p | 2 | Whole chromosomal deletion                          | Detected     |
| IC321 | 18 | 18q | 2 | Whole chromosomal deletion                          | Detected     |
| IC321 | 19 | 19q | 2 | q arm deletion                                      | Detected     |
| IC321 | 20 | 20q | 4 | q arm amplification                                 | Detected     |
| IC321 | 21 | 21q | 4 | q arm amplification                                 | Detected     |
| IC321 | 22 | 22q | 2 | q arm deletion                                      | Detected     |
| IC321 | X  | Xp  | 4 | Whole chromosomal amplification                     | Detected     |
| IC321 | X  | Xq  | 4 | Whole chromosomal amplification                     | Detected     |
| IC343 | 5  | 5p  | 3 | Whole chromosomal deletion                          | Not Detected |
| IC343 | 5  | 5q  | 3 | Whole chromosomal deletion                          | Not Detected |
| IC343 | 9  | 9p  | 3 | Whole chromosomal deletion with differential arm CN | Detected     |
| IC343 | 9  | 9q  | 2 | Whole chromosomal deletion with differential arm CN | Detected     |
| IC343 | 15 | 15q | 3 | q arm deletion                                      | Detected     |
| IC343 | 17 | 17p | 2 | p arm deletion                                      | Detected     |
| IC343 | X  | Xp  | 2 | Whole chromosomal deletion                          | Detected     |
| IC343 | X  | Xq  | 2 | Whole chromosomal deletion                          | Detected     |
| IC400 | 8  | 8p  | 3 | Whole chromosomal amplification                     | Detected     |
| IC400 | 8  | 8q  | 3 | Whole chromosomal amplification                     | Detected     |
| IC400 | 12 | 12p | 3 | Whole chromosomal amplification                     | Detected     |
| IC400 | 12 | 12q | 3 | Whole chromosomal amplification                     | Detected     |
| IC403 | 2  | 2q  | 4 | q arm amplification                                 | Detected     |
| IC403 | 4  | 4p  | 2 | Whole chromosomal deletion                          | Detected     |
| IC403 | 4  | 4q  | 2 | Whole chromosomal deletion                          | Detected     |
| IC403 | 5  | 5p  | 5 | p arm amplification                                 | Detected     |
| IC403 | 5  | 5q  | 2 | q arm deletion                                      | Detected     |
| IC403 | 7  | 7p  | 4 | Whole chromosomal amplification                     | Detected     |
| IC403 | 7  | 7q  | 4 | Whole chromosomal amplification                     | Detected     |
| IC403 | 8  | 8p  | 4 | Whole chromosomal amplification                     | Detected     |
| IC403 | 8  | 8q  | 4 | Whole chromosomal amplification                     | Detected     |
| IC403 | 10 | 10p | 4 | p arm amplification                                 | Detected     |
| IC403 | 11 | 11p | 4 | Whole chromosomal amplification                     | Detected     |
| IC403 | 11 | 11q | 4 | Whole chromosomal amplification                     | Detected     |
| IC403 | 13 | 13q | 5 | q arm amplification                                 | Detected     |
| IC403 | 16 | 16p | 2 | p arm deletion                                      | Detected     |
| IC403 | 17 | 17p | 2 | Whole chromosomal deletion                          | Detected     |
| IC403 | 17 | 17q | 2 | Whole chromosomal deletion                          | Detected     |
| IC403 | 19 | 19p | 2 | Whole chromosomal deletion                          | Detected     |
| IC403 | 19 | 19q | 2 | Whole chromosomal deletion                          | Detected     |
| IC403 | 20 | 20p | 4 | Whole chromosomal amplification                     | Detected     |

|        |    |     |   |                                 |          |
|--------|----|-----|---|---------------------------------|----------|
| IC403  | 20 | 20q | 4 | Whole chromosomal amplification | Detected |
| IC403  | 21 | 21q | 2 | q arm deletion                  | Detected |
| IC403  | 22 | 22q | 2 | q arm deletion                  | Detected |
| IC403  | X  | Xp  | 2 | Whole chromosomal deletion      | Detected |
| IC403  | X  | Xq  | 2 | Whole chromosomal deletion      | Detected |
| S276   | 9  | 9p  | 1 | p arm deletion                  | Detected |
| S276   | 17 | 17p | 1 | p arm deletion                  | Detected |
| S508   | 12 | 12p | 3 | Whole chromosomal amplification | Detected |
| S508   | 12 | 12q | 3 | Whole chromosomal amplification | Detected |
| S531   | 3  | 3p  | 3 | Whole chromosomal amplification | Detected |
| S531   | 3  | 3q  | 3 | Whole chromosomal amplification | Detected |
| S531   | 7  | 7p  | 3 | Whole chromosomal amplification | Detected |
| S531   | 7  | 7q  | 3 | Whole chromosomal amplification | Detected |
| S60136 | 1  | 1p  | 3 | p arm amplification             | Detected |
| S60136 | 16 | 16q | 1 | q arm deletion                  | Detected |
| S60267 | 19 | 19p | 1 | Whole chromosomal deletion      | Detected |
| S60267 | 19 | 19q | 1 | Whole chromosomal deletion      | Detected |
| AOCS34 | 3  | 3p  | 1 | p arm deletion                  | Detected |
| AOCS34 | 4  | 4q  | 1 | q arm deletion                  | Detected |
| AOCS34 | 5  | 5q  | 1 | q arm deletion                  | Detected |
| AOCS34 | 8  | 8q  | 4 | q arm amplification             | Detected |
| AOCS34 | 9  | 9p  | 1 | Whole chromosomal deletion      | Detected |
| AOCS34 | 9  | 9q  | 1 | Whole chromosomal deletion      | Detected |
| AOCS34 | 10 | 10p | 1 | Whole chromosomal deletion      | Detected |
| AOCS34 | 10 | 10q | 1 | Whole chromosomal deletion      | Detected |
| AOCS34 | 11 | 11q | 4 | q arm amplification             | Detected |
| AOCS34 | 15 | 15q | 1 | q arm deletion                  | Detected |
| AOCS34 | 16 | 16q | 1 | q arm deletion                  | Detected |
| AOCS34 | 18 | 18p | 1 | p arm deletion                  | Detected |
| AOCS34 | 22 | 22q | 1 | q arm deletion                  | Detected |

**Table S11.** Sensitivity of larger CNAs detected by ADTEX.

| Sample | Events detected | Events not detected | Sensitivity |
|--------|-----------------|---------------------|-------------|
| OV1    | 29              | 1                   | 96.7%       |
| OV2    | 4               | 0                   | 100%        |
| OV4    | 1               | 0                   | 100%        |
| OV5    | 15              | 0                   | 100%        |
| OV7    | 2               | 0                   | 100%        |
| OV8    | 39              | 2                   | 95.1%       |
| OV9    | 11              | 0                   | 100%        |
| OV11   | 2               | 0                   | 100%        |
| OV12   | 27              | 0                   | 100%        |
| OV13   | 1               | 0                   | 100%        |
| OV14   | 3               | 0                   | 100%        |
| OV15   | 3               | 0                   | 100%        |
| OV16   | 2               | 0                   | 100%        |
| OV17   | 6               | 2                   | 75.0%       |

**Table S12.** Comparison of smaller CNAs identified by ADTEX with other WES methods.

| Sample | ADTEX | ADTEX Vs VarScan 2 | ADTEX Vs ExomeCNV | ADTEX Vs FREEC |
|--------|-------|--------------------|-------------------|----------------|
| OV1    | 10    | 9                  | 9                 | 5              |
| OV2    | 17    | 6                  | 5                 | 2              |
| OV4    | 3     | 3                  | 2                 | 1              |
| OV7    | 46    | 18                 | 21                | 3              |
| OV11   | 9     | 6                  | 2                 | 1              |
| OV13   | 1     | 1                  | 1                 | 0              |
| OV14   | 21    | 2                  | 2                 | 1              |
| OV15   | 211   | 116                | 91                | 15             |
| OV16   | 4     | 2                  | 0                 | 0              |
| OV17   | 32    | 1                  | 1                 | 2              |

## 4 References

- (2011) Integrated genomic analyses of ovarian carcinoma, *Nature*, **474**, 609-615.
- Amarasinghe, K., Li, J. and Halgamuge, S. (2013) CoNVEX: copy number variation estimation in exome sequencing data using HMM, *BMC Bioinformatics*, **14**, S2.
- Boeva, V., *et al.* (2012) Control-FREEC: a tool for assessing copy number and allelic content using next-generation sequencing data, *Bioinformatics*, **28**, 423-425.
- Koboldt, D.C., *et al.* (2012) VarScan 2: Somatic mutation and copy number alteration discovery in cancer by exome sequencing, *Genome Research*, **22**, 568-576.
- Li, H., *et al.* (2009) The Sequence Alignment/Map format and SAMtools, *Bioinformatics*, **25**, 2078-2079.
- Olshen, A.B., *et al.* (2004) Circular binary segmentation for the analysis of array-based DNA copy number data, *Biostatistics*, **5**, 557-572.

Sathirapongsasuti, J.F., *et al.* (2011) Exome Sequencing-Based Copy-Number Variation and Loss of Heterozygosity Detection: ExomeCNV, *Bioinformatics*.

Van Loo, P., *et al.* (2010) Allele-specific copy number analysis of tumors, *Proceedings of the National Academy of Sciences*, **107**, 16910-16915.
